# Supplementary material for: Prognostic models for adverse pregnancy outcomes in low-income and middle-income countries: a systematic review
Source: PubMed Central journal article supplement — BMJ Glob Health. 2019 Oct 30;4(5):e001759. doi: 10.1136/bmjgh-2019-001759 (PMC6830054; doi:10.1136/bmjgh-2019-001759), 2019-10-30
Supplement: bmjgh-2019-001759supp002.pdf [file bmjgh-2019-001759supp002.pdf]

## Low-income economies (n=34)

|                          |                           |                      |
|--------------------------|---------------------------|----------------------|
| Afghanistan              | Guinea-Bissau             | Sierra Leone         |
| Benin                    | Haiti                     | Somalia              |
| Burkina Faso             | Korea, Dem. People's Rep. | South Sudan          |
| Burundi                  | Liberia                   | Syrian Arab Republic |
| Central African Republic | Madagascar                | Tajikistan           |
| Chad                     | Malawi                    | Tanzania             |
| Comoros                  | Mali                      | Togo                 |
| Congo, Dem. Rep          | Mozambique                | Uganda               |
| Eritrea                  | Nepal                     | Yemen, Rep.          |
| Ethiopia                 | Niger                     | Zimbabwe             |
| Gambia, The              | Rwanda                    |                      |
| Guinea                   | Senegal                   |                      |

## Lower-middle-income economies (n=47)

|                  |                       |                       |
|------------------|-----------------------|-----------------------|
| Angola           | Indonesia             | Papua New Guinea      |
| Bangladesh       | Kenya                 | Philippines           |
| Bhutan           | Kiribati              | São Tomé and Príncipe |
| Bolivia          | Kosovo                | Solomon Islands       |
| Cabo Verde       | Kyrgyz Republic       | Sri Lanka             |
| Cambodia         | Lao PDR               | Sudan                 |
| Cameroon         | Lesotho               | Swaziland             |
| Congo, Rep.      | Mauritania            | Timor-Leste           |
| Côte d'Ivoire    | Micronesia, Fed. Sts. | Tunisia               |
| Djibouti         | Moldova               | Ukraine               |
| Egypt, Arab Rep. | Mongolia              | Uzbekistan            |
| El Salvador      | Morocco               | Vanuatu               |
| Georgia          | Myanmar               | Vietnam               |
| Ghana            | Nicaragua             | West Bank and Gaza    |
| Honduras         | Nigeria               | Zambia                |

|       |          |  |
|-------|----------|--|
| India | Pakistan |  |
|-------|----------|--|

## Upper-middle-income economies (n=56)

|                        |                    |                                |
|------------------------|--------------------|--------------------------------|
| Albania                | Fiji               | Namibia                        |
| Algeria                | Gabon              | Nauru                          |
| American Samoa         | Grenada            | Paraguay                       |
| Armenia                | Guatemala          | Peru                           |
| Azerbaijan             | Guyana             | Romania                        |
| Belarus                | Iran, Islamic Rep. | Russian Federation             |
| Belize                 | Iraq               | Samoa                          |
| Bosnia and Herzegovina | Jamaica            | Serbia                         |
| Botswana               | Jordan             | South Africa                   |
| Brazil                 | Kazakhstan         | St. Lucia                      |
| Bulgaria               | Lebanon            | St. Vincent and the Grenadines |
| China                  | Libya              | Suriname                       |
| Colombia               | Macedonia, FYR     | Thailand                       |
| Costa Rica             | Malaysia           | Tonga                          |
| Cuba                   | Maldives           | Turkey                         |
| Dominica               | Marshall Islands   | Turkmenistan                   |
| Dominican Republic     | Mauritius          | Tuvalu                         |
| Equatorial Guinea      | Mexico             | Venezuela, RB                  |
| Ecuador                | Montenegro         |                                |
