# Supplementary material for: Prognostic models for adverse pregnancy outcomes in low-income and middle-income countries: a systematic review
Source: PubMed Central journal article supplement — BMJ Glob Health. 2019 Oct 30;4(5):e001759. doi: 10.1136/bmjgh-2019-001759 (PMC6830054; doi:10.1136/bmjgh-2019-001759), 2019-10-30
Supplement: bmjgh-2019-001759supp003.pdf [file bmjgh-2019-001759supp003.pdf]

## Search strategy

**Main question:**

What are the available prognostic models for adverse pregnancy outcomes in low and middle income countries and their performance?

**Inclusion criteria:**

- Development and/or validation of a prognostic model
- Prognostic model included at least 2 predictors or more
- Study undertaken in a low- or middle-income country
- Outcome focused on adverse pregnancy outcomes, both maternal and perinatal

**Search string:**

| Determinant                       | Outcome                                                   | Domain                          |
|-----------------------------------|-----------------------------------------------------------|---------------------------------|
| Prognostic model/prediction model | Adverse pregnancy outcomes/pregnancy complications [Mesh] | Low and middle income countries |
| Validat*                          | Pregnancy complications                                   | Developing countries            |
| Predict*                          | Abortion, spontaneous                                     | Low resource                    |
| Rule*                             | Diabetes, gestational                                     | Low resource setting            |
| Outcome*                          | Fetal death                                               | Limited resource                |
| Risk*                             | Stillbirth                                                | Constrained resource            |
| Model*                            | Perinatal mortality                                       | Restricted resource             |
| History                           | Perinatal death                                           | Delimited resource              |
| Variable*                         | Fetal diseases                                            | Low-income country              |
| Criteria                          | Hypertension, pregnancy-induced                           | Low-income countries            |
| Scor*                             | Eclampsia                                                 | Low resourced                   |
| Characteristic*                   | HELLP syndrome                                            | Middle-income country           |
| Finding*                          | Pre-eclampsia                                             | Middle-income countries         |
| Factor*                           | Obstetric labor complications                             | (Africa)                        |
| Deciscion*                        | Vacuum extraction, obstetrical                            | (Asia)                          |
| Identif*                          | Obstetrical forceps                                       | (Caribbean)                     |
| Prognos*                          | Cesarean section                                          | (West Indies)                   |

|                             |                                     |                   |
|-----------------------------|-------------------------------------|-------------------|
| Clinical*                   | Placenta Previa                     | (South America)   |
| Logistic Models             | Uterine cervical incompetence       | (Latin America)   |
| Prognostic                  | fetal membranes, premature rupture  | (Central America) |
| Risk score                  | Obstetric labor, premature          |                   |
| Prediction model            | Premature birth                     |                   |
| Prediction rule             | Hypertensive disorders of pregnancy |                   |
| Risk assessment             | Maternal death                      |                   |
| algorithm                   | Post-partum haemorrhage             |                   |
| Decision support techniques | Shoulder dystocia                   |                   |
| Algorithms                  | Manual placenta removal             |                   |
|                             | Growth restrict*                    |                   |
|                             | Breach of membranes                 |                   |
|                             | Preterm labour                      |                   |

### Specific search strategy per electronic database

#### Pubmed: 880 (update: 73)

##### #1

((Validat\* OR Predict\*[ti] OR Rule\*) OR (Predict\* AND (Outcome\* OR Risk\*[tiab] OR Model\*[tiab])) OR ((History OR Variable\* OR Criteria OR Scor\*[tiab] OR Characteristic\* OR Finding\* OR Factor\*) AND (Predict\* OR Model\*[tiab] OR Decision\* OR Identif\* OR Prognos\*)) OR (Decision\* AND (Model\*[tiab] OR Clinical\* OR "Logistic Models"[Mesh])) OR (Prognostic AND (History OR Variable\* OR Criteria OR Scor\*[tiab] OR Characteristic\* OR Finding\* OR Factor\* OR Model\*[tiab])) OR "risk score"[tiab] OR "prediction model"[tiab] OR "prediction rule"[tiab] OR "risk assessment"[tiab] OR "algorithm"[tiab] OR "Decision Support Techniques"[Mesh] OR "Risk Assessment"[Mesh] OR "Algorithms"[Mesh])

##### #2

("pregnancy complications"[MeSH Terms] OR "abortion, spontaneous"[MeSH Terms] OR "diabetes, gestational"[MeSH Terms] OR "fetal death"[MeSH Terms] OR "stillbirth"[MeSH Terms] OR "perinatal mortality"[MeSH Terms] OR "perinatal death"[MeSH Terms] OR "fetal diseases"[MeSH Terms] OR "hypertension, pregnancy-induced"[MeSH Terms] OR "eclampsia"[MeSH Terms] OR "hellp syndrome"[MeSH Terms] OR "pre-eclampsia"[MeSH Terms] OR "obstetric labor complications"[MeSH Terms] OR "vacuum extraction, obstetrical"[MeSH Terms] OR "obstetrical forceps"[MeSH Terms] OR "cesarean section"[MeSH Terms] OR "diabetes, gestational"[MeSH Terms] OR "placenta previa"[MeSH Terms] OR "uterine cervical incompetence"[MeSH Terms] OR "fetal membranes, premature rupture"[MeSH Terms] OR "obstetric labor, premature"[MeSH Terms] OR "premature birth"[MeSH Terms] OR "Hypertensive Disorders of Pregnancy"[Title/Abstract] OR "Maternal Death"[Title/Abstract] OR "Post Partum Haemorrhage"[Title/Abstract] OR "Shoulder dystocia"[Title/Abstract] OR "Manual Placenta

Removal"[Title/Abstract] OR Growth restrict\*[Title/Abstract] OR "Breach of membranes"[Title/Abstract] OR "Preterm labour"[Title/Abstract] OR stillbirth[Title/Abstract])

#3

("Developing countries"[MeSH] OR low resource[Title/Abstract] OR low resource setting[Title/Abstract] OR limited resource[Title/Abstract] OR constrained resource[Title/Abstract] OR restricted resource[Title/Abstract] OR delimited resource[Title/Abstract] OR restrained resource[Title/Abstract] OR low-income country[Title/Abstract] OR low-income countries[Title/Abstract] OR low resourced[Title/Abstract] OR middle-income country[Title/Abstract] OR middle-income countries [Title/Abstract])

#4

#1 AND #2 AND #3

**Embase: 267 (update: 11)**

#1

validat\* OR predict\* OR rule\* OR (predict\* AND (outcome\* OR risk\* OR model\*)) OR ('history'/exp OR history OR variable\* OR criteria OR scor\* OR characteristic\* OR finding\* OR factor\* AND (predict\* OR model\* OR decision\* OR identif\* OR prognos\*)) OR (decision\* AND (model\* OR clinical\* OR 'logistic models'/exp OR 'logistic models')) OR (prognostic AND ('history'/exp OR history OR variable\* OR criteria OR scor\* OR characteristic\* OR finding\* OR factor\* OR model\*)) OR 'risk score'/exp OR 'risk score' OR 'prediction model'/exp OR 'prediction model' OR 'prediction rule' OR 'algorithm'/exp OR 'algorithm' OR 'decision support techniques'/exp OR 'decision support techniques' OR 'risk assessment'/exp OR 'risk assessment' OR 'algorithms'/exp OR 'algorithms'

#2

'pregnancy complication' OR 'abortion' OR 'pregnancy diabetes mellitus' OR 'fetus death' OR 'fetus mortality' OR 'stillbirth' OR 'perinatal mortality' OR 'maternal hypertension' OR 'eclampsia and preeclampsia' OR 'prematurity' OR 'cesarean section' OR 'hellp syndrome' OR 'postpartum hemorrhage' OR 'labor complication' OR 'premature labor' OR 'membrane rupture' OR ('pregnancy complications' OR 'abortion, spontaneous' OR 'fetal death' OR 'stillbirth' OR 'perinatal mortality' OR 'perinatal death' OR 'fetal diseases' OR 'hypertension, pregnancy-induced' OR 'eclampsia' OR 'hellp syndrome' OR 'pre-eclampsia' OR 'obstetric labor complications' OR 'vacuum extraction, obstetrical' OR 'obstetrical forceps' OR 'cesarean section' OR 'diabetes, gestational' OR 'placenta previa' OR 'uterine cervical incompetence' OR 'fetal membranes, premature rupture' OR 'obstetric labor, premature' OR 'premature birth' OR 'hypertensive disorders of pregnancy' OR 'maternal death' OR 'post partum haemorrhage' OR 'shoulder dystocia' OR 'manual placenta removal' OR growth AND restrict\*) OR 'breach of membranes' OR 'preterm labour'

#3

'developing countries' OR low AND resource OR low AND resource AND setting OR limited AND resource OR constrained AND resource OR restricted AND resource OR delimited AND resource OR restrained AND resource OR 'low income' AND country OR 'low income' AND countries OR low AND resourced OR 'middle income' AND country OR 'middle income' AND countries

#4

#1 and #2 and #3

**Cochrane library:**

**Results: 1067 (update: 162)**

#1

((Validat\* or Predict\* or Rule\*) or (Predict\* and (Outcome\* or Risk\* or Model\*)) or ((History or Variable\* or Criteria or Scor\* or Characteristic\* or Finding\* or Factor\*) and (Predict\* or Model\* or Decision\* or Identif\* or Prognos\*)) or (Decision\* and (Model\* or Clinical\* or "Logistic Models")) or (Prognostic and (History or Variable\* or Criteria or Scor\* or Characteristic\* or Finding\* or Factor\* or Model\*)) or "risk score" or "prediction model" or "prediction rule" or "risk assessment" or "algorithm" or "Decision Support Techniques" or "Risk Assessment" or "Algorithms")

#2

("pregnancy complications" or "abortion, spontaneous" or "diabetes, gestational" or "fetal death" or "stillbirth" or "perinatal mortality" or "perinatal death" or "fetal diseases" or "hypertension, pregnancy-induced" or "eclampsia" or "hellp syndrome" or "pre-eclampsia" or "obstetric labor complications" or "vacuum extraction, obstetrical" or "obstetrical forceps" or "cesarean section" or "diabetes, gestational" or "placenta previa" or "uterine cervical incompetence" or "fetal membranes, premature rupture" or "obstetric labor, premature" or "premature birth" or "Hypertensive Disorders of Pregnancy" or "Maternal Death" or "Post Partum Haemorrhage" or "Shoulder dystocia" or "Manual Placenta Removal" or Growth restrict\* or "Breach of membranes" or "Preterm labour")

#3

("Developing countries" or low resource or low resource setting or limited resource or constrained resource or restricted resource or delimited resource or restrained resource or low-income country or low-income countries or low resourced or middle-income country or middle-income countries)

#4

{AND #1-#3}

**Global health library: 425 (update: 16)**

**Filters: LILACS, WPRIM, WHOLIS, South America, Asia, Africa and Caribbean**

(tw:(((Validat\* OR Predict\* OR Rule\*) OR (Predict\* AND (Outcome\* OR Risk\* OR Model\*)) OR ((History OR Variable\* OR Criteria OR Scor\* OR Characteristic\* OR Finding\* OR Factor\*) AND (Predict\* OR Model\* OR Decision\* OR Identif\* OR Prognos\*)) OR (Decision\* AND (Model\* OR Clinical\* OR "Logistic Models")) OR (Prognostic AND (History OR Variable\* OR Criteria OR Scor\* OR Characteristic\* OR Finding\* OR Factor\* OR Model\*)) OR "risk score" OR "prediction model" OR "prediction rule" OR "risk assessment" OR "algorithm" OR "Decision Support Techniques" OR "Risk Assessment" OR "Algorithms") AND ("pregnancy complications" OR "spontaneous abortion" OR "gestational diabetes" OR "fetal death" OR "stillbirth" OR "perinatal mortality" OR "perinatal death" OR "fetal diseases" OR "pregnancy-induced hypertension" OR "eclampsia" OR "hellp syndrome" OR "pre-eclampsia" OR "labor complications" OR "labour complications" OR "vacuum extraction" OR "obstetrical forceps" OR "cesarean section" OR "caesarean section" OR "gestational diabetes" OR "placenta previa" OR "uterine cervical incompetence" OR ("premature rupture" AND membranes) OR "premature labor" OR "premature labour" OR "premature birth" OR "Hypertensive Disorders of Pregnancy" OR "Maternal Death" OR "Post-Partum Haemorrhage" OR "PostPartum Haemorrhage" OR "Post-Partum Hemorrhage" OR "PostPartum Hemorrhage" OR "Shoulder dystocia" OR "Manual Placenta Removal" OR "Growth restriction" OR "Breach of membranes" OR "Preterm labour" OR "Pre-term labour" OR "Preterm labor" OR "Pre-term labor" OR stillbirth))))))

**Outcome definition, as recommended by the WHO or uptodate.com**

| Outcome                             | Definition                                                                                                                                                                    |
|-------------------------------------|-------------------------------------------------------------------------------------------------------------------------------------------------------------------------------|
| Abortion, spontaneous               | Termination of pregnancy from natural causes before 20 weeks of gestational age or less 500 g.                                                                                |
| Diabetes, gestational               | Diabetes that developed during pregnancy and is diagnosis conducted by the WHO criteria.                                                                                      |
| Fetal death                         | See stillbirth                                                                                                                                                                |
| Stillbirth                          | Baby born with no signs of life at or after 28 weeks of gestation                                                                                                             |
| Perinatal mortality                 | Number of stillbirths and deaths in the first week of life                                                                                                                    |
| Perinatal death                     | See above                                                                                                                                                                     |
| Fetal diseases                      | Diseases of anomalies in the fetus                                                                                                                                            |
| Hypertension, pregnancy-induced     | Hypertension without proteinuria or other signs/symptoms of preeclampsia-related end-organ dysfunction that develops after 20 weeks of gestation                              |
| Eclampsia                           | Development of grand mal seizures in a woman with preeclampsia in the absence of other neurologic conditions that could account for the seizure                               |
| HELLP syndrome                      | Combination of hemolysis, elevated liver enzymes and low platelets                                                                                                            |
| Pre-eclampsia                       | Hypertension and proteinuria or hypertension and significant end-organ dysfunction with or without proteinuria after 20 weeks of gestation in a previously normotensive woman |
| Hypertensive disorders in pregnancy | See above                                                                                                                                                                     |
| Obstetric labor complications       | General                                                                                                                                                                       |
| Vacuum extraction                   | Use of vacuum extraction to deliver newborn                                                                                                                                   |
| Obstetrical forceps                 | Use of obstetrical forceps to deliver newborn                                                                                                                                 |
| Cesarean section                    | Cesarean delivery of the newborn                                                                                                                                              |
| Placenta Previa                     | Presence of placental tissue that extends over the internal cervical os                                                                                                       |
| Uterine cervical incompetence       | The inability of the uterine cervix to retain a pregnancy in the second trimester in the absence of clinical contractions, labor, or both                                     |
| Fetal membranes, premature rupture  | Membrane rupture before the onset of uterine contractions                                                                                                                     |
| Breach of membranes                 | See above                                                                                                                                                                     |
| Obstetric labor, premature          | Delivery before gestational age of 37 weeks                                                                                                                                   |
| Premature birth                     | See above                                                                                                                                                                     |
| Preterm labour                      | See above                                                                                                                                                                     |
| Maternal death                      | Death as a result of pregnancy-related conditions                                                                                                                             |
| Post-partum haemorrhage             | Estimated blood loss $\geq 500$ mL after vaginal birth or $\geq 1000$ mL after cesarean delivery                                                                              |
| Shoulder dystocia                   | Obstruction of one of the fetal shoulders behind the symphysis pubis after delivery of the head.                                                                              |
| Manual placenta removal             | Manual removal of placenta if controlled cord traction or drugs are not effective                                                                                             |

Growth restrict\*

Fetus that has not reached its growth potential  
because of genetic or environmental factors
