# Supplementary material for: Prognostic models for adverse pregnancy outcomes in low-income and middle-income countries: a systematic review
Source: PubMed Central journal article supplement — BMJ Glob Health. 2019 Oct 30;4(5):e001759. doi: 10.1136/bmjgh-2019-001759 (PMC6830054; doi:10.1136/bmjgh-2019-001759), 2019-10-30
Supplement: bmjgh-2019-001759supp004.pdf [file bmjgh-2019-001759supp004.pdf]

General information

| Overview all articles |      |       |             |                     |                   |         |                   |                                |       |                  |
|-----------------------|------|-------|-------------|---------------------|-------------------|---------|-------------------|--------------------------------|-------|------------------|
| General information   |      |       | Study type  |                     |                   | Domain  |                   | Outcome                        |       | Prognostic model |
| Author                | Year | Title | Development | External validation | Incremental value | Country | Income-type (mix) | Type of pregnancy complication | Label |                  |
|                       |      |       |             |                     |                   |         |                   |                                |       |                  |

Development articles

| General information |      |       |                            |                    |                       |                                       | Methods |                             |                                          |                  |                               |                               |                               |                         |
|---------------------|------|-------|----------------------------|--------------------|-----------------------|---------------------------------------|---------|-----------------------------|------------------------------------------|------------------|-------------------------------|-------------------------------|-------------------------------|-------------------------|
| Overall information |      |       | Paper information          |                    | Study population      |                                       | Outcome |                             | Model development                        | Validation       |                               |                               |                               |                         |
| Author              | Year | Title | number of models developed | Model/label number | Source of data/design | Inclusion criteria used/ participants | Country | Outcome under investigation | Prediction horizon/ candidate predictors | Modelling method | Internal validation performed | Method of internal validation | external validation performed | incremental value paper |
|                     |      |       |                            |                    |                       |                                       |         |                             |                                          |                  |                               |                               |                               |                         |

| Results         |                              |                                       |                                                   |                                              |                      |                                                  |                             |             |                         |                                                           |                                       |                             |             |                         |                                                                                              |                     |
|-----------------|------------------------------|---------------------------------------|---------------------------------------------------|----------------------------------------------|----------------------|--------------------------------------------------|-----------------------------|-------------|-------------------------|-----------------------------------------------------------|---------------------------------------|-----------------------------|-------------|-------------------------|----------------------------------------------------------------------------------------------|---------------------|
| Sample size     |                              | Internal validation                   |                                                   | Predictors                                   |                      |                                                  | Model performance           |             |                         | Extended/adjusted model performance                       |                                       |                             |             | Final                   |                                                                                              |                     |
| N= participants | N= participants with outcome | N=of participant in validation sample | N= participants with outcome in validation sample | Number of predictors used in the final model | Predictors were used | Predictors in final model including interactions | overall performance measure | calibration | Discrimination measures | Number of predictors used in the extended/ adjusted model | Which predictors were added/ adjusted | Overall performance measure | calibration | Discrimination measures | Presentation of the final prediction models to allow application of the model to the patient | Additional comments |
|                 |                              |                                       |                                                   |                                              |                      |                                                  |                             |             |                         |                                                           |                                       |                             |             |                         |                                                                                              |                     |

## External validation

| Overall             |      |       |                                   |         |      |             |                        |                            |              | Method             |         |                                                     |
|---------------------|------|-------|-----------------------------------|---------|------|-------------|------------------------|----------------------------|--------------|--------------------|---------|-----------------------------------------------------|
| General information |      |       | Information validated score/model |         |      |             |                        | Study information          |              | Study population   |         | Method                                              |
| Author              | Year | Title | First author                      | Journal | Year | Score/model | predictors implemented | Number of models validated | Model number | Inclusion criteria | Country | Type of external validation (more options possible) |
|                     |      |       |                                   |         |      |             |                        |                            |              |                    |         |                                                     |

| Results                |                                     |                                                                                                                                                    |             |                         |                                                                                                                           |                                                  |                             |                                                                |                         |                                                                                                                           |                                                  |                     |  |
|------------------------|-------------------------------------|----------------------------------------------------------------------------------------------------------------------------------------------------|-------------|-------------------------|---------------------------------------------------------------------------------------------------------------------------|--------------------------------------------------|-----------------------------|----------------------------------------------------------------|-------------------------|---------------------------------------------------------------------------------------------------------------------------|--------------------------------------------------|---------------------|--|
| Sample size            |                                     | Model performance after validation of non-adjusted/-updated model, so model applied to validation population without adjustment or update of model |             |                         |                                                                                                                           |                                                  |                             | Model performance after adjustment or update of original model |                         |                                                                                                                           |                                                  | Additional comments |  |
| Number of participants | Number of participants with outcome | Overall performance                                                                                                                                | Calibration | discrimination measures | (Re-)classification measures and for which cut-off points (specify each classification measure of each cut-off presented) | in case of reclassification, indicate comparator | Overall performance measure | Calibration                                                    | discrimination measures | (Re-)classification measures and for which cut-off points (specify each classification measure of each cut-off presented) | in case of reclassification, indicate comparator |                     |  |
|                        |                                     |                                                                                                                                                    |             |                         |                                                                                                                           |                                                  |                             |                                                                |                         |                                                                                                                           |                                                  |                     |  |

## Incremental value

| General information   |      |       |             |                                 |         |      |             |         |                           |              |                                 |                       |                                               |                   |             |                       |  |
|-----------------------|------|-------|-------------|---------------------------------|---------|------|-------------|---------|---------------------------|--------------|---------------------------------|-----------------------|-----------------------------------------------|-------------------|-------------|-----------------------|--|
| 1 overall information |      |       |             | 2 information incremented score |         |      |             |         | 3 paper information       |              |                                 |                       | 4 Predictors                                  |                   |             | 5 additional comments |  |
| Authors               | Year | Title | Model/score | First author                    | Journal | Year | Model/score | Country | Number of models extended | Model number | Participants included (outcome) | Validation performed? | Newly added predictors including interactions | Model performance | Final model |                       |  |
|                       |      |       |             |                                 |         |      |             |         |                           |              |                                 |                       |                                               |                   |             |                       |  |

| Criteria                                                                                                           | Yes/Probably yes                                                                                                                                   | No/Probably no                                                                                                                                                                                               | Unclear                                                  |
|--------------------------------------------------------------------------------------------------------------------|----------------------------------------------------------------------------------------------------------------------------------------------------|--------------------------------------------------------------------------------------------------------------------------------------------------------------------------------------------------------------|----------------------------------------------------------|
| 1. Were appropriate data sources used, e.g. cohort, RCT or nested case-control data?                               | Cohort design, nested case-control or case-cohort design                                                                                           | Non-nested case-control design                                                                                                                                                                               | unclear method                                           |
| 2. Were all inclusions and exclusions of participants appropriate?                                                 | Starting point for inclusion was all participants in which the model will be used in practice; aka population of interest                          | Participants included who already had the outcome in prognostic studies or if specific subgroups are excluded that may have altered the performance of the model.                                            | Unclear whether appropriate in- or exclusions took place |
| 3. <i>Were participant selection criteria similar to the model development study?*</i>                             | In- and exclusion criteria in the validation study are similar to the model development study                                                      | Difference in in- and exclusion criteria                                                                                                                                                                     | No information                                           |
| 1. Were predictors defined and assessed in a similar way for all patients?                                         | If definitions of predictors and their assessment were similar for all participants                                                                | If different definitions were used for the same predictor, especially those subjectively assessed. Also if predictors requiring subjective interpretation are assessed by differently experienced assessors. | No information                                           |
| 2. <i>Were predictors defined and assessed in a similar way to predictors in the development model?*</i>           | If predictors in the validation study were defined and assessed in a similar way to predictors in the model development study                      | The assessment or definition of predictors was different from the model development study                                                                                                                    | No information available                                 |
| 3. Were predictor assessments made without knowledge of outcome data?                                              | If outcome information was not available when assessing predictors                                                                                 | if it is clear that outcome information was available when assessing predictors                                                                                                                              | No information available                                 |
| 4. Are all predictors available at the time the model is intended to be used?                                      | All included predictors were available at the time the model is used for prediction                                                                | Predictors were assessed after the time the model is used for prediction                                                                                                                                     | No information available                                 |
| 1. Was the outcome determined appropriately?                                                                       | If a method of outcome determination has been used which is considered optimal or acceptable for the target condition by experts                   | If a clearly suboptimal method has been used that causes unacceptable levels of error in determining patient outcomes.                                                                                       | No information                                           |
| 2. Was a pre-specified or standard outcome definition used?                                                        | Outcome is objective (dead vs. alive) or standard definition is used (BMI>25 = overweight) or pre-specified categories are used to group outcomes. | Outcome definition not standard and was not pre-specified.                                                                                                                                                   | No information                                           |
| 3. Were predictors excluded from the outcome definition?                                                           | If none of the predictors are included in the outcome definition                                                                                   | If one or more of the predictors forms part of the outcome definition                                                                                                                                        | No information                                           |
| 4. Was the outcome defined and determined in a similar way for all participants?                                   | Determined in similar way for all participants                                                                                                     | If outcomes were clearly determined in a different way for some participants                                                                                                                                 | No information                                           |
| 5. <i>Was the outcome defined and determined in a similar way to the outcomes in the model development study?*</i> | Outcome was defined and determined in a similar way to the outcome in the model development study                                                  | Outcome was defined and determined in a different way to the outcome in the model development study                                                                                                          | No information                                           |

|                                                                                                                       |                                                                                                                                                                                                                                                                         |                                                                                                                                                                                                                                                                                                                                                                                        |                |
|-----------------------------------------------------------------------------------------------------------------------|-------------------------------------------------------------------------------------------------------------------------------------------------------------------------------------------------------------------------------------------------------------------------|----------------------------------------------------------------------------------------------------------------------------------------------------------------------------------------------------------------------------------------------------------------------------------------------------------------------------------------------------------------------------------------|----------------|
| 6. Was the outcome determined without knowledge of predictor information?                                             | If predictor information was not known when determining the outcome status, or outcome determination is reported as determined without knowledge of predictor information                                                                                               | If it is clear that predictor information was available when determining the outcome status                                                                                                                                                                                                                                                                                            | No information |
| 7. Was the time interval between predictor assessment and outcome determination appropriate?                          | If the time interval between predictor assessment and outcome determination was appropriate to enable a representative number of relevant outcomes to be recorded                                                                                                       | If the time interval is too short or too long to enable a representative number of relevant outcomes to be recorded.                                                                                                                                                                                                                                                                   | No information |
| 1. Were there a reasonable number of participants with the outcome?                                                   | For model development studies, if the number of outcome events relative to the number of candidate predictors is 10 or more ( $EPV \geq 10$ ). For model validation studies, if the number of outcome events is 100 or more.                                            | For model development studies, the number of outcome events relative to the number of candidate predictors is less than 10 ( $EPV < 10$ ). For model validation studies, if the number of outcome events is less than 100                                                                                                                                                              | No information |
| 2. Were continuous and categorical predictors handled appropriately?                                                  | If continuous predictors are not converted into two or more categories when included in the model (i.e. dichotomised or categorised), and if continuous predictors are examined for nonlinearity using, for example, fractional polynomials or restricted cubic splines | If categorical predictor groups definitions do not use a pre-specified or standard method. For model development studies, if continuous predictors are converted into two or more categories when included in the model. For model validation studies, if continuous predictors or categorical variables are categorised using different cut-points compared to the development study. | No information |
| 3. Were all enrolled participants included in the analysis?                                                           | If all participants enrolled in the study are included in the data analysis.                                                                                                                                                                                            | If some or a subgroup of participants are inappropriately excluded from the analysis                                                                                                                                                                                                                                                                                                   | No information |
| 4. Were participants with missing data handled appropriately?                                                         | If there are no missing values of predictors or outcomes and the study explicitly reports that participants are not excluded on the basis of missing data, or if missing values are replaced using multiple imputation                                                  | If participants with missing data are omitted from the analysis, or if the method of handling missing data is clearly flawed e.g. missing indicator method or inappropriate use of last value carried forward.                                                                                                                                                                         | No information |
| 5. Was selection of predictors based on univariate analysis avoided? **                                               | If the predictors are not selected based on univariate analysis prior to multivariable modelling                                                                                                                                                                        | If the predictors are selected based on univariate analysis prior to multivariable modelling.                                                                                                                                                                                                                                                                                          | No information |
| 6. Were complexities in the data (e.g. censoring, competing risks, sampling of controls) accounted for appropriately? | If any complexities in the data are accounted for appropriately, or if it is clear that potential data complexities have been identified appropriately as unimportant.                                                                                                  | If complexities in the data that could affect model performance are ignored                                                                                                                                                                                                                                                                                                            | No information |

|                                                                                                                          |                                                                                                                                                                 |                                                                                                                                                                                                                                                                                                                                                                                                               |                |
|--------------------------------------------------------------------------------------------------------------------------|-----------------------------------------------------------------------------------------------------------------------------------------------------------------|---------------------------------------------------------------------------------------------------------------------------------------------------------------------------------------------------------------------------------------------------------------------------------------------------------------------------------------------------------------------------------------------------------------|----------------|
| 7. Were relevant model performance measures evaluated appropriately?                                                     | If both calibration and discrimination are evaluated appropriately (including relevant measures tailored for models predicting survival outcomes)               | If both calibration and discrimination are not evaluated, or if only goodness-of-fit tests, such as the Hosmer-Lemeshow test are used to evaluate calibration, or if for models predicting survival outcomes performance measures accounting for censoring are not used, or if measures like sensitivity, specificity or predictive values, were presented using thresholds derived from the dataset at hand. | No information |
| 8. Was model overfitting and optimism in model performance accounted for? **                                             | If internal validation techniques, such as bootstrapping and cross-validation have been used to account for any optimism in model fitting.                      | If no internal validation has been performed, or if internal validation consists only of a single random split-sample of participant data, or if the bootstrapping or cross-validation did not include all model development procedures including any variable selection                                                                                                                                      | No information |
| 9. Do predictors and their assigned weights in the final model correspond to the results from multivariable analysis? ** | If the predictors and regression coefficients in the final model correspond to results from a multivariable analysis restricted to exactly the same predictors. | If the predictors and regression coefficients in the final model do not correspond to results from a multivariable analysis restricted to exactly the same predictors.                                                                                                                                                                                                                                        | No information |

| Study                     | Model     | Patient selection | Predictors | Outcomes | Analysis |         |
|---------------------------|-----------|-------------------|------------|----------|----------|---------|
| Kayode, G.A.; 2016        | Still1    | 1. Yes            | Yes        | Yes      | Yes      |         |
|                           |           | 2. No             | -          | Yes      | Yes      |         |
|                           |           | 3. -              | Yes        | Yes      | Yes      |         |
|                           |           |                   | Yes        | Yes      | Yes      |         |
|                           |           |                   |            |          | -        | Yes     |
|                           |           |                   |            |          | No       | Yes     |
|                           |           |                   |            |          | Unclear  | Yes     |
|                           |           |                   |            |          |          | Yes     |
|                           |           |                   |            |          |          | Yes     |
| Romero-Gutiérrez, G; 2005 | Still2    | Yes               | Yes        | Yes      | Yes      |         |
|                           |           | Yes               | -          | Yes      | Yes      |         |
|                           |           | -                 | No         | Yes      | Yes      |         |
|                           |           |                   | Unclear    | Yes      | Yes      |         |
|                           |           |                   |            |          | -        | No      |
|                           |           |                   |            |          | Unclear  | Unclear |
|                           |           |                   |            |          | No       | Unclear |
|                           |           |                   |            |          |          | Unclear |
|                           |           |                   |            |          |          | Yes     |
| Ukah, U. V. ; 2017        | fullPIERS | Yes               | Yes        | Yes      | Yes      |         |
|                           |           | Yes               | Yes        | Yes      | -        |         |
|                           |           | Yes               | Unclear    | Yes      | -        |         |
|                           |           |                   | Yes        | Yes      | Yes      |         |
|                           |           |                   |            |          | Yes      | -       |
|                           |           |                   |            |          | Unclear  | -       |
|                           |           |                   |            |          | Yes      | Yes     |
|                           |           |                   |            |          |          | Yes     |
|                           |           |                   |            |          |          | Yes     |
| Payne, B. A. ; 2015       | Still3    | Yes               | Yes        | Yes      | Yes      |         |
|                           |           | Yes               | -          | Yes      | Yes      |         |
|                           |           | -                 | Yes        | Yes      | No       |         |
|                           |           |                   | Yes        | Yes      | Yes      |         |
|                           |           |                   |            |          | -        | Yes     |
|                           |           |                   |            |          | Unclear  | Yes     |
|                           |           |                   |            |          | Yes      | Yes     |
|                           |           |                   |            |          |          | Yes     |
|                           |           |                   |            |          |          | Yes     |
| Payne, B. A.; 2014        | miniPIERS | Yes               | Yes        | Yes      | Yes      |         |
|                           |           | Yes               | -          | Yes      | Yes      |         |

|                      |                     |     |         |         |         |
|----------------------|---------------------|-----|---------|---------|---------|
|                      |                     | -   | Yes     | Yes     | No      |
|                      |                     |     | Yes     | Yes     | Yes     |
|                      |                     |     |         | -       | Yes     |
|                      |                     |     |         | Unclear | Yes     |
|                      |                     |     |         | Yes     | Yes     |
|                      |                     |     |         |         | Yes     |
|                      |                     |     |         |         | Yes     |
| Payne, B.A.; 2015    | miniPIERS(<br>SpO2) | Yes | Yes     | Yes     | Yes     |
|                      |                     | Yes | -       | Yes     | Yes     |
|                      |                     | -   | Yes     | Yes     | Yes     |
|                      |                     |     | Yes     | Yes     | Yes     |
|                      |                     |     |         | -       | -       |
|                      |                     |     |         | Yes     | Yes     |
|                      |                     |     |         | Yes     | Yes     |
|                      |                     |     |         |         | -       |
|                      |                     |     |         |         | Yes     |
| Kumar, M; 2016       | Hyper               | Yes | Unclear | Yes     | Yes     |
|                      |                     | Yes | -       | Yes     | Yes     |
|                      |                     | -   | No      | Yes     | No      |
|                      |                     |     | Unclear | Yes     | Unclear |
|                      |                     |     |         | -       | Yes     |
|                      |                     |     |         | Unclear | Unclear |
|                      |                     |     |         | Unclear | Yes     |
|                      |                     |     |         |         | No      |
|                      |                     |     |         |         | Yes     |
| Geelhoed, D; 2006    | Anem1               | Yes | Yes     | Yes     | Yes     |
|                      |                     | Yes | -       | Yes     | Unclear |
|                      |                     | -   | No      | No      | Yes     |
|                      |                     |     | No      | Yes     | Unclear |
|                      |                     |     |         | -       | Unclear |
|                      |                     |     |         | No      | Unclear |
|                      |                     |     |         | No      | Unclear |
|                      |                     |     |         |         | Unclear |
|                      |                     |     |         |         | Yes     |
| Harutyunyan, A; 2013 | Eclamps1            | Yes | Yes     | Yes     | Yes     |
|                      |                     | Yes | -       | Yes     | Yes     |
|                      |                     | -   | Unclear | Yes     | No      |
|                      |                     |     | Yes     | Yes     | Yes     |
|                      |                     |     |         | -       | Yes     |
|                      |                     |     |         | No      | Unclear |
|                      |                     |     |         | No      | Yes     |



|                      |              |                                               |         |         |                                     |
|----------------------|--------------|-----------------------------------------------|---------|---------|-------------------------------------|
|                      |              |                                               |         |         | Yes                                 |
|                      |              |                                               |         |         | Unclear                             |
| Nascimento, L. F. C. | ND1          | No                                            | Unclear | Yes     | Yes                                 |
|                      |              | Unclear                                       | Yes     | Yes     | Yes                                 |
|                      |              | Yes                                           | Unclear | Yes     | Unclear                             |
|                      |              |                                               | Yes     | Yes     | Unclear                             |
|                      |              |                                               |         | Yes     | Unclear                             |
|                      |              |                                               |         | Unclear | Unclear                             |
|                      |              |                                               |         | Unclear | Unclear                             |
|                      |              |                                               |         |         | Yes                                 |
|                      |              |                                               |         |         | Unclear                             |
| Tsu, V; 1994         | pph1         | No                                            | Yes     | Yes     | Yes                                 |
|                      |              | Yes                                           | -       | No      | Yes                                 |
|                      |              | -                                             | No      | Yes     | Unclear                             |
|                      |              |                                               | Yes     | Yes     | Unclear                             |
|                      |              |                                               |         | -       | Yes                                 |
|                      |              |                                               |         | Unclear | Unclear                             |
|                      |              |                                               |         | Yes     | Unclear                             |
|                      |              |                                               |         |         | No                                  |
|                      |              |                                               |         |         | Yes                                 |
|                      |              |                                               |         |         |                                     |
| Nelissen, E; 2013    | mnm1         | No                                            | Yes     | Yes     | No                                  |
|                      |              | Yes                                           | No      | Yes     | Yes                                 |
|                      |              | No                                            | No      | No      | -                                   |
|                      |              |                                               | Yes     | Yes     | Yes                                 |
|                      |              |                                               |         | No      | Unclear                             |
|                      |              |                                               |         | No      | Unclear                             |
|                      |              |                                               |         | Unclear | Unclear                             |
|                      |              |                                               |         |         | No                                  |
|                      |              |                                               |         |         | Yes                                 |
| Tilahun, S; 2008     | PM1          |                                               |         |         |                                     |
| Zhou, J; 2012        | Pe1 and gdm1 | Unclear (sounds like cohort but not reported) | Yes     | Yes     | No for pre-eclampsia<br>Yes for GBM |
|                      |              | Yes                                           | -       | Yes     | Yes                                 |
|                      |              | -                                             | Yes     | Yes     | Unclear                             |
|                      |              |                                               | Yes     | Yes     | Unclear                             |
|                      |              |                                               |         | -       | Yes                                 |
|                      |              |                                               |         | Yes     | Unclear                             |
|                      |              |                                               |         | Yes     | Unclear                             |
|                      |              |                                               |         |         | Unclear                             |

|                            |      |         |         |         |         |
|----------------------------|------|---------|---------|---------|---------|
|                            |      |         |         |         | Yes     |
| Hoirisch-Clapauch, S; 2011 | Pe2  | Yes     | Unclear | Yes     | Yes     |
|                            |      | Yes     | -       | Yes     | Yes     |
|                            |      | -       | Unclear | Yes     | Yes     |
|                            |      |         | Yes     | Yes     | Unclear |
|                            |      |         |         | -       | Yes     |
|                            |      |         |         | No      | Unclear |
|                            |      |         |         | Yes     | Yes     |
|                            |      |         |         |         | Yes     |
|                            |      |         |         |         | Yes     |
| Phaloprakarn, C; 2009      | gdm2 | Yes     | Yes     | Yes     | Yes     |
|                            |      | Unclear | -       | Yes     | Unclear |
|                            |      | -       | No      | No      | Yes     |
|                            |      |         | Yes     | Yes     | Unclear |
|                            |      |         |         | -       | Yes     |
|                            |      |         |         | No      | Unclear |
|                            |      |         |         | Unclear | Yes     |
|                            |      |         |         |         | Yes     |
|                            |      |         |         |         | Yes     |
| Sekizawa, A; 2010          | pe3  | Yes     | Yes     | Yes     | No      |
|                            |      | Yes     | -       | Yes     | Unclear |
|                            |      | -       | Yes     | Yes     | No      |
|                            |      |         | Unclear | Yes     | Unclear |
|                            |      |         |         | -       | Yes     |
|                            |      |         |         | Yes     | Unclear |
|                            |      |         |         | Unclear | Yes     |
|                            |      |         |         |         | No      |
|                            |      |         |         |         | Unclear |
| De Oliveira, R; 2012       | spl1 | Yes     | Yes     | Yes     | No      |
|                            |      | Yes     | -       | Yes     | Yes     |
|                            |      | -       | Yes     | Yes     | No      |
|                            |      |         | Yes     | Yes     | Yes     |
|                            |      |         |         | -       | Yes     |
|                            |      |         |         | Unclear | Unclear |
|                            |      |         |         | Yes     | Yes     |
|                            |      |         |         |         | Yes     |
|                            |      |         |         |         | Unclear |
| Benjamin, S; 2012          | cpd1 | Yes     | Unclear | Unclear | No      |
|                            |      | Yes     | -       | Unclear | Unclear |
|                            |      | -       | Unclear | Unclear | No      |

|                 |      |     |         |         |         |
|-----------------|------|-----|---------|---------|---------|
|                 |      |     | Unclear | Yes     | Unclear |
|                 |      |     |         | -       | Unclear |
|                 |      |     |         | Unclear | Unclear |
|                 |      |     |         | Unclear | Yes     |
|                 |      |     |         |         | Unclear |
|                 |      |     |         |         | No      |
| Prata, N; 2011  | pph2 | Yes | Yes     | Yes     | No      |
|                 |      | Yes | -       | Yes     | Yes     |
|                 |      | -   | Yes     | Yes     | Yes     |
|                 |      |     | Yes     | Yes     | Yes     |
|                 |      |     |         | -       | Yes     |
|                 |      |     |         | Unclear | Unclear |
|                 |      |     |         | Yes     | Yes     |
|                 |      |     |         |         | Unclear |
|                 |      |     |         |         | Unclear |
| Antwi, E- 2018  | GH2  | Yes | Yes     | Yes     | Yes     |
|                 |      | Yes | -       | Yes     | Yes     |
|                 |      | -   | Yes     | Yes     | No      |
|                 |      |     | Yes     | Yes     | Yes     |
|                 |      |     |         | -       | Yes     |
|                 |      |     |         | Unclear | Yes     |
|                 |      |     |         | Yes     | Yes     |
|                 |      |     |         |         | Unclear |
|                 |      |     |         |         | Unclear |
| Antwi, E - 2017 | GH1  | Yes | Yes     | Yes     | Yes     |
|                 |      | Yes | -       | Yes     | Yes     |
|                 |      | -   | Unclear | No      | Yes     |
|                 |      |     | Yes     | Yes     | Unclear |
|                 |      |     |         | -       | Yes     |
|                 |      |     |         | Unclear | Yes     |
|                 |      |     |         | Yes     | Yes     |
|                 |      |     |         |         | Yes     |
|                 |      |     |         |         | Yes     |
