# Supplementary material for: Prognostic models for adverse pregnancy outcomes in low-income and middle-income countries: a systematic review
Source: PubMed Central journal article supplement — BMJ Glob Health. 2019 Oct 30;4(5):e001759. doi: 10.1136/bmjgh-2019-001759 (PMC6830054; doi:10.1136/bmjgh-2019-001759), 2019-10-30
Supplement: bmjgh-2019-001759supp005.pdf [file bmjgh-2019-001759supp005.pdf]

**Table 1: Overview of outcomes under investigation**

| Type                                                   | Outcome                                                                                                                                                                           | Defined in study                                                                                                                                                                                           |
|--------------------------------------------------------|-----------------------------------------------------------------------------------------------------------------------------------------------------------------------------------|------------------------------------------------------------------------------------------------------------------------------------------------------------------------------------------------------------|
| <b>Maternal outcome</b>                                | Anaemia in pregnancy (Geelhoed, 2006)                                                                                                                                             | Hemoglobin <8g/dl                                                                                                                                                                                          |
|                                                        | Cephalopelvic disproportion (Benjamin, 2011)                                                                                                                                      |                                                                                                                                                                                                            |
|                                                        | Gestational diabetes (Zhou, 2012)                                                                                                                                                 | OGTT according to ADA criteria                                                                                                                                                                             |
|                                                        | Gestational diabetes (Phaloprakarn, 2009)                                                                                                                                         | According to Carpenter and Coustan criteria                                                                                                                                                                |
|                                                        | Gestational Hypertension (Antwi, 2017)                                                                                                                                            | Blood pressure greater than 140/90 mmHg                                                                                                                                                                    |
|                                                        | Gestational Hypertension (Kumar, 2016)                                                                                                                                            | Blood pressure greater than 140/90 mmHg                                                                                                                                                                    |
|                                                        | Gestational hypertension (Antwi, 2018)                                                                                                                                            | Blood pressure greater than 140/90 mmHg                                                                                                                                                                    |
|                                                        | Gestational hypertension related complications (Payne, 2014)                                                                                                                      | Adverse maternal outcome determined by Delphi consensus: include maternal mortality or one or more of serious central nervous system, cardiorespiratory, renal, hepatic, hematological, or other morbidity |
|                                                        | Gestational hypertension related complications (Ukah, 2017)                                                                                                                       | Adverse maternal outcome determined by Delphi consensus: include maternal mortality or one or more of serious central nervous system, cardiorespiratory, renal, hepatic, hematological, or other morbidity |
|                                                        | Gestational hypertension related complications (Payne, 2015)                                                                                                                      | Adverse maternal outcome determined by Delphi consensus: include maternal mortality or one or more of serious central nervous system, cardiorespiratory, renal, hepatic, hematological, or other morbidity |
|                                                        | Postpartum haemorrhage (Tsu, 1994)                                                                                                                                                | Post-partum blood loss of >600 ml after vaginal delivery                                                                                                                                                   |
|                                                        | Postpartum haemorrhage (Prata, 2011)                                                                                                                                              | Post-partum blood loss of $\geq$ 500 ml                                                                                                                                                                    |
|                                                        | Pre-eclampsia (Zhou, 2012)                                                                                                                                                        | Blood pressure $\geq$ 140/90 mm Hg on repeated readings and proteinuria $\geq$ 300 mg/24 h or $\geq$ 1+ dipstick after 20 weeks' gestation                                                                 |
|                                                        | Pre-eclampsia (Hoirisch-Clapauch, 2011)                                                                                                                                           | Systolic blood pressure $\geq$ 140 mmHg or diastolic blood pressure $\geq$ 90 mmHg after the 20th week of gestation and proteinuria                                                                        |
| Pre-eclampsia (Sekizawa, 2010)                         | Severe gestational hypertension (systolic pressure of >160 mmHg or diastolic blood pressure of >110 mmHg on two or more occasions after gestational week 20 or severe proteinuria |                                                                                                                                                                                                            |
| Pre-eclampsia in multiparous women (Harutyunyan, 2013) | Multiparous women living diagnosed with preeclampsia                                                                                                                              |                                                                                                                                                                                                            |
| <b>Neonatal outcome</b>                                | Neonatal death (Nascimento, 2009)                                                                                                                                                 | Neonatal death up to 28 days                                                                                                                                                                               |
|                                                        | Spontaneous preterm labor (de Oliveira, 2012)                                                                                                                                     | Gestational age between 22 and 34 weeks and symptoms of preterm labor (two or more contractions lasting for at least 40 s in 10 min associated with cervix changes)                                        |
|                                                        | Stillbirth (Kayode, 2016)                                                                                                                                                         | Fetal death after 20 completed weeks of gestation                                                                                                                                                          |
|                                                        | Stillbirth (Romero-Gutiérrez, 2005)                                                                                                                                               | Singleton stillbirth before labor                                                                                                                                                                          |
|                                                        | Stillbirth and neonatal deaths (Payne, 2015)                                                                                                                                      | Stillbirth or neonatal death after 32 weeks of gestation.                                                                                                                                                  |
